# Supplementary material for: Sniff Species: SURMOF-Based Sensor Array Discriminates Aromatic Plants beyond the Genus Level
Source: MDPI journal article supplement (doi:10.3390/chemosensors9070171), 2021-07-06
Supplement: s1 [file s1]

# Sniff Species: SURMOF-Based Sensor Array Discriminates Aromatic Plants Beyond the Genus Level

Salih Okur <sup>1,\*</sup>, Chun Li <sup>1</sup>, Zejun Zhang <sup>1</sup>, Sahi Vaidurya Pratap <sup>2</sup>, Mohammed Mohammed Sarheed <sup>2</sup>, Adnan Kanbar <sup>2</sup>, Leonard Franke <sup>3</sup>, Felix Geislhöringer <sup>3</sup>, Lars Heinke <sup>1</sup>, Uli Lemmer <sup>3,4</sup>, Peter Nick <sup>2</sup> and Christof Wöll <sup>1</sup>

- <sup>1</sup> Institute of Functional Interfaces (IFG), Karlsruhe Institute of Technology (KIT), Hermann-von-Helmholtz-Platz 1, 76344 Eggenstein-Leopoldshafen, Germany; chun.li@partner.kit.edu (C.L.); zejun.zhang@partner.kit.edu (Z.Z.); lars.heinke@kit.edu (L.H.); christof.woell@kit.edu (C.W.)
- <sup>2</sup> Molecular Cell Biology, Botanical Institute, Karlsruhe Institute of Technology, Fritz-Haber-Weg, 76131 Karlsruhe, Germany; sahi.vaidurya@kit.edu (S.V.P.); mu.sarheed@gmail.com (M.M.S.); adnan.kanbar@kit.edu (A.K.); peter.nick@kit.edu (P.N.)
- <sup>3</sup> Light Technology Institute, Karlsruhe Institute of Technology, Engesserstraße 13, 76131 Karlsruhe, Germany; leonard.franke@kit.edu (L.F.); felix.geislhoeringer@kit.edu (F.G.); uli.lemmer@kit.edu (U.L.)
- <sup>4</sup> Institute of Microstructure Technology, Karlsruhe Institute of Technology, Hermann-von-Helmholtz-Platz 1, Eggenstein-Leopoldshafen, 76344 Karlsruhe, Germany
- \* Correspondence: salih.okur2@kit.edu; Tel.: +49-721-608-26078

**Citation:** Okur, S.; Li, C.; Zhang, Z.; Vaidurya Pratap, S.; Mohammed Sarheed, M.; Kanbar, A.; Franke, L.; Geislhöringer, F.; Heinke, L.; Lemmer, U.; et al. Sniff Species: SURMOF-Based Sensor Array Discriminates Aromatic Plants Beyond the Genus Level. *Chemosensors* **2021**, *9*, 171. <http://doi.org/10.3390/chemosensors9070171>

Academic Editor: Anne Claude Ro-main

Received: 9 June 2021  
Accepted: 1 July 2021  
Published: 6 July 2021

**Publisher's Note:** MDPI stays neutral with regard to jurisdictional claims in published maps and institutional affiliations.

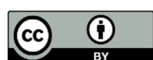

**Copyright:** © 2021 by the authors. Licensee MDPI, Basel, Switzerland. This article is an open access article distributed under the terms and conditions of the Creative Commons Attribution (CC BY) license (<http://creativecommons.org/licenses/by/4.0/>).

## 1. X-Ray Diffractograms

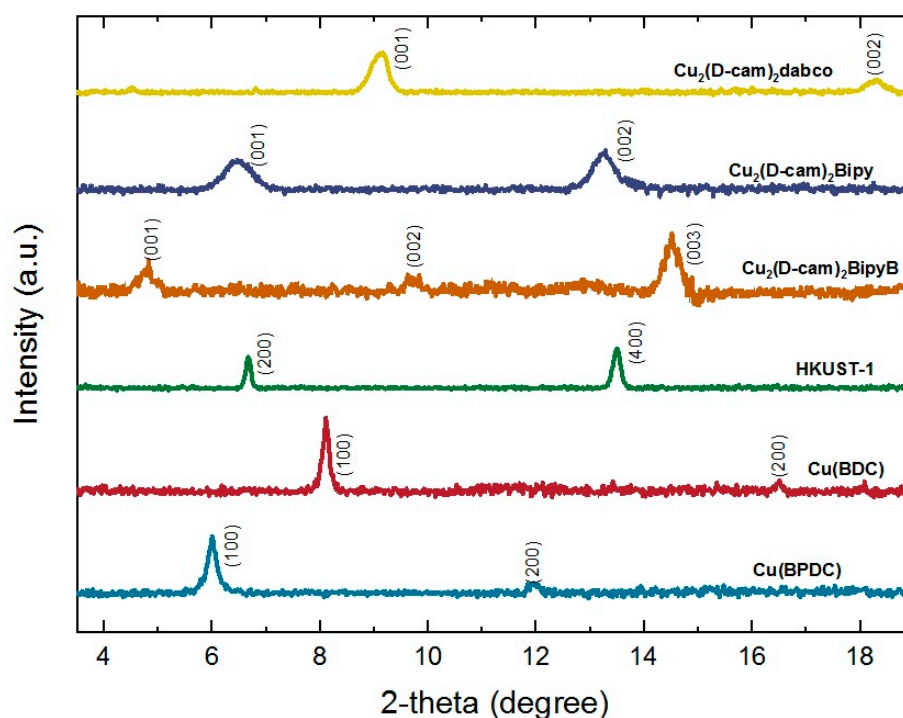

**Figure S1.** The X-ray diffractograms of the SURMOFs thin films of the sensor array used in the e-Nose system. e.g. Cu<sub>2</sub>(DCam)<sub>2</sub>(dabco), Cu<sub>2</sub>(DCam)<sub>2</sub>(BiPy), Cu<sub>2</sub>(DCam)<sub>2</sub>(BiPyB), HKUST-1, Cu(BDC), Cu(BPDC). The data indicates crystalline, oriented growth of the MOF films with the targeted structure.

## 2. Frequency Shifts

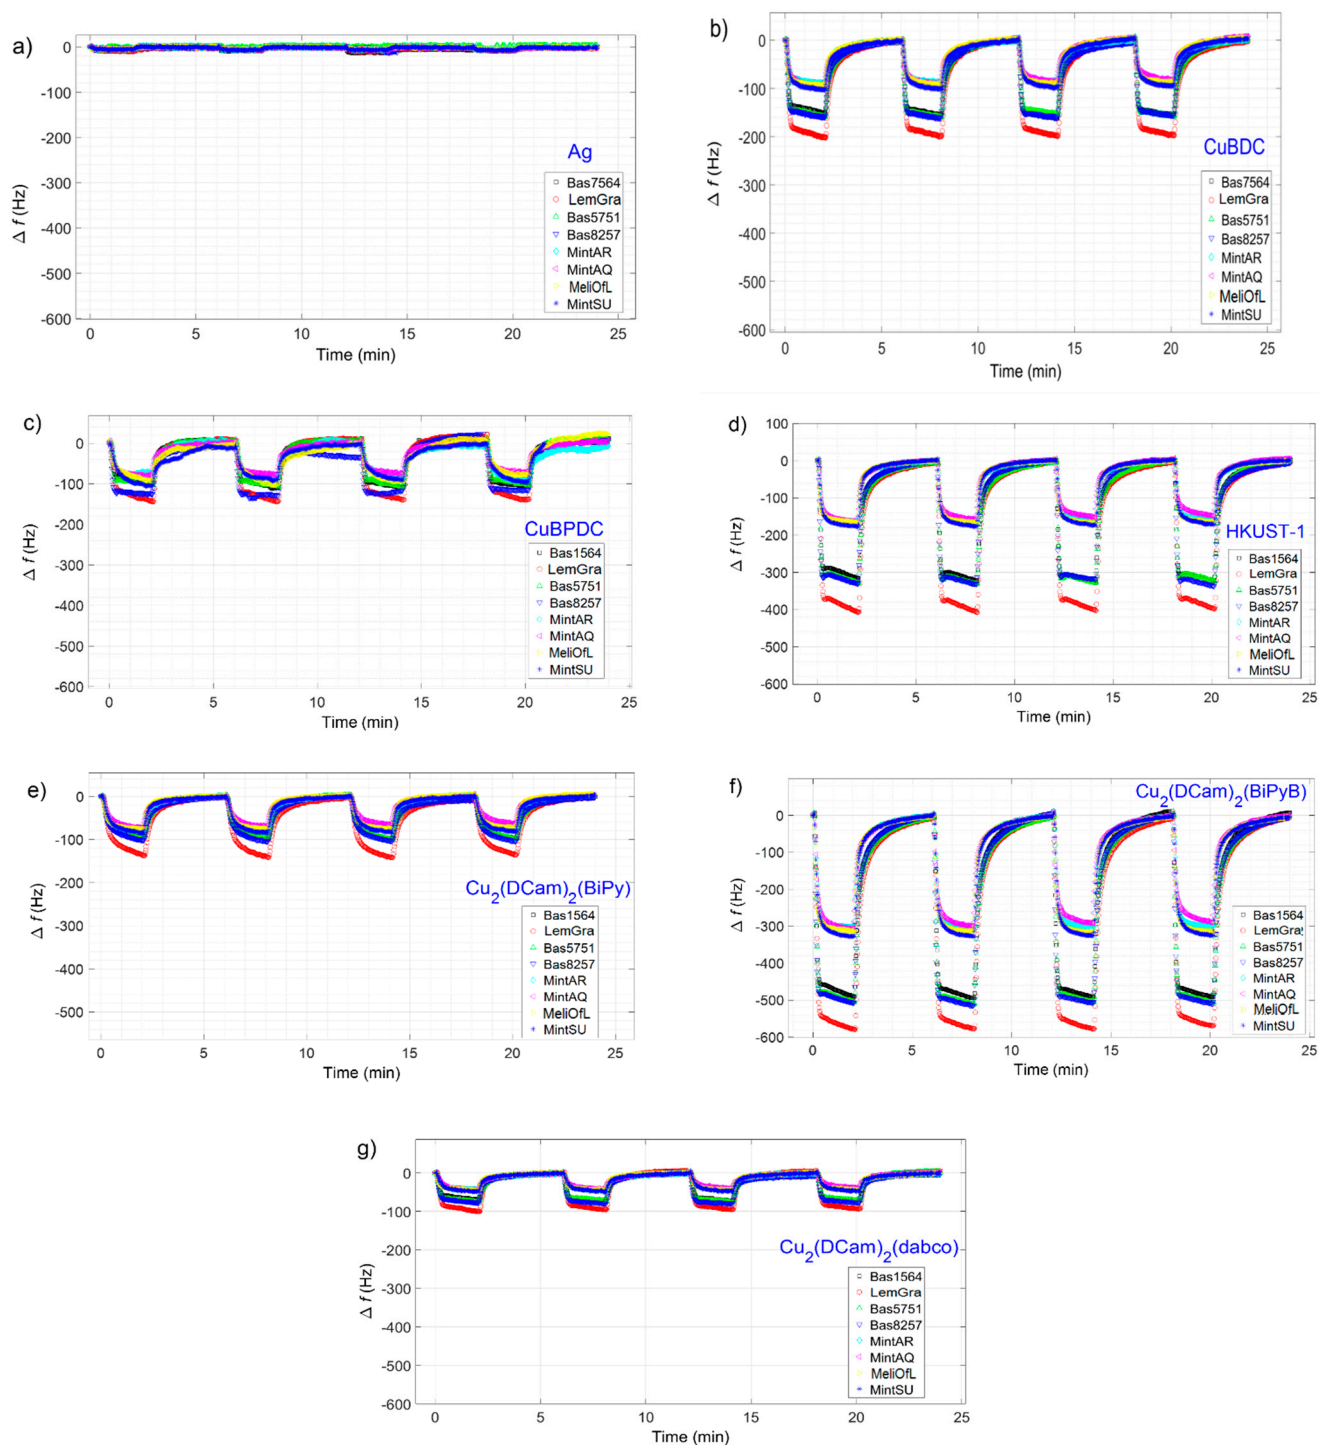

**Figure S2.** Resonance frequency shifts of the sensor array with 7 different sensing materials (see Table 1 for abbreviations) during 4 cycles of exposure to the individual Basel/Mint/Lemon Grass/Melissa O.L. leaves.

### 3. Nonlinear Least Square Fit

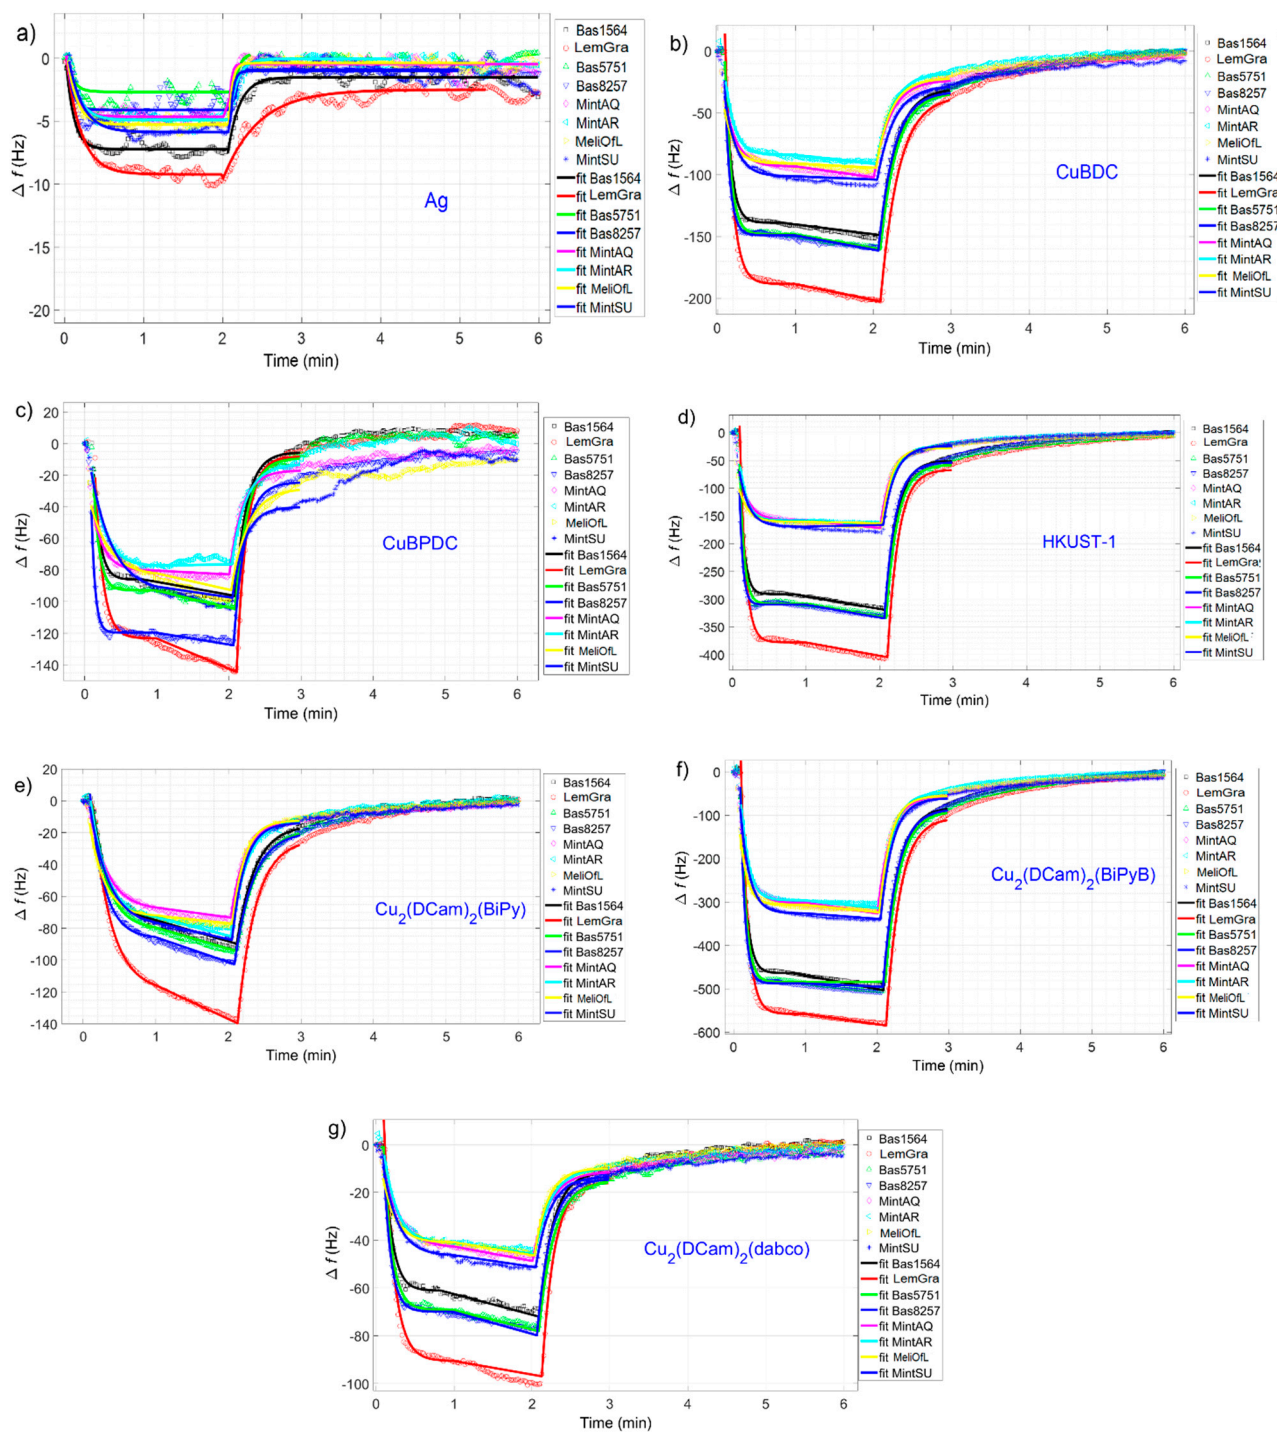

**Figure S3.** Nonlinear Least square fit to an exponential rise function describing (Adsorption process) and an exponential drop function as (desorption process) to find response time values of the sensor array.

**Table S1.** The response times calculated from Nonlinear Least square fit to an exponential rise function describing (Adsorption process) and an exponential drop function as (desorption process).

| Sensor array                                | Bas1564      |      | LemGra       |      | Bas5751      |      | Bas8257      |      | MintAQ       |      | MintAR       |      | MeliOfL      |      | MintSU       |      |
|---------------------------------------------|--------------|------|--------------|------|--------------|------|--------------|------|--------------|------|--------------|------|--------------|------|--------------|------|
|                                             | 5 $\tau$ (s) |      | 5 $\tau$ (s) |      | 5 $\tau$ (s) |      | 5 $\tau$ (s) |      | 5 $\tau$ (s) |      | 5 $\tau$ (s) |      | 5 $\tau$ (s) |      | 5 $\tau$ (s) |      |
|                                             | Ads.         | Des. |
| Ag                                          | 23.6         | 61.2 | 43.0         | 75.3 | 10.9         | 31.5 | 8.4          | 27.1 | 34.2         | 13.5 | 20.7         | 50.9 | 27.3         | 14.2 | 73.4         | 21.4 |
| Cu(BDC)                                     | 23.1         | 61.9 | 28.2         | 58.4 | 22.4         | 62.2 | 19.4         | 59.3 | 45.4         | 62.3 | 35.8         | 62.9 | 39.1         | 58.8 | 44.1         | 62.1 |
| Cu(BPDC)                                    | 26.4         | 47.1 | 32.9         | 39.8 | 24.0         | 48.3 | 15.5         | 46.4 | 47.3         | 53.6 | 55.5         | 59.2 | 78.8         | 77.3 | 91.2         | 51.5 |
| HKUST-1                                     | 17.8         | 43.6 | 23.1         | 43.1 | 17.4         | 45.4 | 13.5         | 42.7 | 42.0         | 44.1 | 28.6         | 45.0 | 37.4         | 42.6 | 39.9         | 45.5 |
| Cu <sub>2</sub> (Dcam) <sub>2</sub> (BiPy)  | 64.8         | 75.3 | 78.6         | 74.3 | 66.3         | 80.9 | 59.2         | 76.8 | 76.6         | 57.5 | 66.8         | 64.9 | 62.5         | 50.9 | 79.8         | 52.8 |
| Cu <sub>2</sub> (Dcam) <sub>2</sub> (BiPyB) | 23.3         | 56.3 | 27.8         | 57.5 | 22.2         | 58.3 | 18.6         | 57.9 | 40.2         | 50.7 | 32.2         | 53.2 | 30.5         | 45.8 | 38.5         | 51.3 |
| Cu <sub>2</sub> (Dcam) <sub>2</sub> (dabco) | 31.1         | 51.5 | 38.5         | 46.9 | 31.5         | 55.8 | 27.4         | 51.3 | 66.3         | 62.5 | 49.6         | 62.6 | 49.9         | 50.6 | 56.9         | 55.6 |

#### 4. Change in the k-NN accuracies with increasing number of nearest neighbor

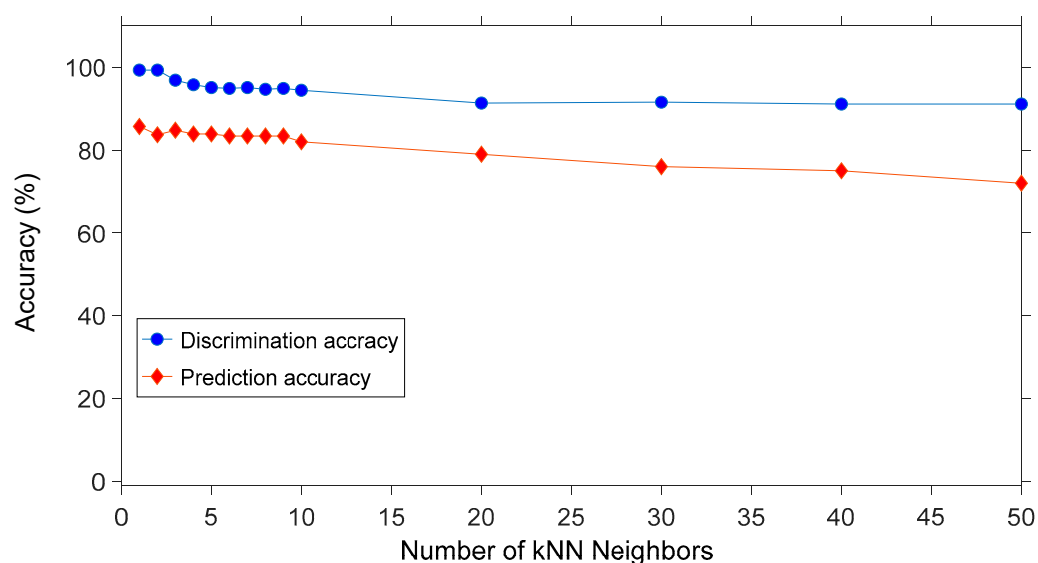

**Figure S4.** The change in the k-NN discrimination and prediction accuracies with increasing number of nearest neighbor between 2 and 50.
